# Supplementary material for: Live (Rose Bengal stained) foraminiferal faunas from the northern Arabian Sea: faunal succession within and below the OMZ
Source: Copernicus journal article supplement (doi:10.5194/bg-11-1155-2014), 2014-02-26
Supplement: Supplementary file 1 [file Appendix A.pdf › appendix/Appendix A.pdf]

**Appendix A: Species of benthic foraminifera of the Murray ridge, with reference to plates and figures in the literature.**

| Agglutinated species                                           | References                                                                                                                                                                                    |
|----------------------------------------------------------------|-----------------------------------------------------------------------------------------------------------------------------------------------------------------------------------------------|
| <i>Adercotryma glomeratum</i> (Brady, 1878)                    | Jones (1994), pl. 34, figs. 15-18                                                                                                                                                             |
| <i>Ammolagena clavata</i> (Jones and Parker 1860)              | Jones (1994), pl. 41, figs. 12-16                                                                                                                                                             |
| <i>Ammoscalaria pseudospiralis</i> (Williamson, 1858)          | Jones (1994), pl. 33, figs. 1-4                                                                                                                                                               |
| <i>Ammoscalaria tenuimargo</i> (Brady, 1882)                   | Jones (1994), pl. 33, figs. 13-16                                                                                                                                                             |
| <i>Ammoscalaria</i> sp.                                        | Our specimens are characterized by a more coiled test at the base than <i>Ammoscalaria tenuimargo</i> .                                                                                       |
| <i>Ammodiscus</i> sp.                                          | Maas (2000) <i>A. cretaceous</i> (Reuss, 1845), pl. 1, fig. 2<br>Jannink et al.(1998) <i>Ammodiscus</i> sp., pl. 1, fig. 2<br>Schumacher et al. (2007) <i>Ammodiscus</i> sp.1, pl. 1, fig. 21 |
| <i>Ammobaculites cylindricus</i> Cushman, 1910                 | Jones (1994), pl. 33, fig. 6                                                                                                                                                                  |
| <i>Ammobaculites agglutinans</i> (d'Orbigny, 1846)             | Jones (1994), pl. 32, figs 19-20, 24-26                                                                                                                                                       |
| <i>Buzasina ringens</i> (Brady, 1879)                          | Jones (1994), pl. 40, figs. 17-18                                                                                                                                                             |
| <i>Cribrostomoides bradyi</i> (Robertson, 1891)                | Timm (1992), pl. 3, fig. 13                                                                                                                                                                   |
| <i>Cribrostomoides</i> cf. <i>jeffreysi</i> (Williamson, 1858) | Maas (2000), <i>Labrospira</i> sp., pl. 1, fig. 1                                                                                                                                             |
| <i>Cribrostomoides scitulum</i> (Brady, 1881)                  | Jones (1994) <i>Veloroninoides scitulus</i> , pl. 34, figs. 11-13                                                                                                                             |
| <i>Cribrostomoides subglobosus</i> (Cushman, 1910)             | Jones (1994), pl. 34, figs. 8-10                                                                                                                                                              |
| <i>Cribrostomoides</i> spp.                                    |                                                                                                                                                                                               |
| <i>Cystammina</i> sp.                                          | Triserial test with more inflated chambers than <i>Cystammina pauciloculata</i> . The test is finely grained.                                                                                 |
| <i>Cyclammina cancellata</i> Brady, 1879                       | Jones (1994), pl. 37, figs. 8-16                                                                                                                                                              |
| <i>Dorothia scabra</i> (Brady, 1884)                           | Jones (1994), pl. 46, fig. 7                                                                                                                                                                  |
| <i>Eggerella bradyi</i> (Cushman, 1911)                        | Jones (1994), pl. 47, figs. 4-7                                                                                                                                                               |
| <i>Eggerelloides scabra</i> (Williamson, 1858)                 | Jones (1994), pl. 47, figs. 15-17                                                                                                                                                             |
| <i>Eggerelloides advena</i> Cushman, 1922                      | Schiebel (1992), pl. 8, fig. 3                                                                                                                                                                |
| <i>Evolutinella rotulata</i> (Brady, 1881)                     | Jones (1994), pl. 34, figs. 5-6                                                                                                                                                               |
| <i>Glaphyrammina americana</i> (Cushman, 1910)                 | Jones (1994), pl. 34, figs. 1-4                                                                                                                                                               |
| <i>Globotextularia</i> spp.                                    |                                                                                                                                                                                               |

## Appendix A: Species of benthic foraminifera of the Murray ridge, with reference to plates and figures in the literature.

|                                                                   |                                                                                                                                   |
|-------------------------------------------------------------------|-----------------------------------------------------------------------------------------------------------------------------------|
| <i>Glomospira charoides</i> Jones and Parker, 1860                | Jones (1994) <i>Usbekistania charoides</i> , pl. 38, figs. 10-16                                                                  |
| <i>Glomospira gordialis</i> (Jones and Parker, 1860)              | Jones (1994), pl. 38, figs. 7-8                                                                                                   |
| <i>Haplophragmoides</i> spp.                                      |                                                                                                                                   |
| <i>Hormosina globulifera</i> Brady 1879                           | Jones (1994), pl. 39, figs. 1-4, 6                                                                                                |
| <i>Hormosina guttifer</i> (Brady, 1881)                           | Jones (1994), pl. 31, figs. 10-15                                                                                                 |
| <i>Hormosina</i> sp. 1                                            | Our specimens present a test composed of 4 chambers. Chambers are flattened and tightly connected. Test grains are medium-coarse. |
| <i>Hormosina</i> sp. 2                                            | Short test composed of few flattened chambers.                                                                                    |
| <i>Karrerulina conversa</i> (Grzybowski, 1901)                    | Jones (1994), pl. 46, figs. 17-19                                                                                                 |
| <i>Labrospira</i> spp.                                            |                                                                                                                                   |
| <i>Lagenammina difflugiformis</i> (Brady, 1879)                   | Mackensen et al. (1990), pl. 6, fig. 9                                                                                            |
| <i>Lagenammina tubulatum</i> (Rhumbler, 1931)                     | Timm (1992), pl. 1, fig. 14                                                                                                       |
| <i>Lagenammina</i> sp.                                            | More elongated test than <i>Lagenammina difflugiformis</i>                                                                        |
| <i>Martinotiella communis</i> (d'Orbigny, 1846)                   | Jones (1994), pl. 48, figs. 1-2, 4-8, 3?                                                                                          |
| <i>Paratrochamina challenger</i> (Brönnimann and Whittaker, 1988) | Brönnimann and Whittaker (1988), pl. 16, figs. h-k                                                                                |
| <i>Portatrochammina bipolaris</i> Brönnimann and Whittaker, 1988  | Brönnimann and Whittaker (1988), pl. 20-31                                                                                        |
| <i>Psammosphaera fusca</i> Schulze, 1875                          | Jones (1994), pl. 18, figs. 1-8                                                                                                   |
| <i>Pseudotrochammina</i> spp.                                     |                                                                                                                                   |
| <i>Recurvoides contortus</i> Earland, 1934                        | Loeblich and Tappan (1988), pl. 68, figs. 7-14                                                                                    |
| <i>Recurvoides</i> spp.                                           |                                                                                                                                   |
| <i>Reopahx agglutinans</i> Cushman, 1913                          | Jones (1994), pl. 30, fig. 13                                                                                                     |
| <i>Reopahx bilocularis</i> Flint, 1899 (Plate 1, fig. 22)         | Schmiedl et al. (1997), pl. 1, figs. 3-4                                                                                          |
| <i>Reopahx dentaliniformis</i> (Brady, 1881)                      | Jones (1994), pl. 30, figs. 21-22                                                                                                 |
| <i>Reopahx fusiformis</i> (Williamson, 1858)                      | Maas (2000) <i>Nouria ploymorphoides</i> Heron-Allen and Earland, 1914, pl. 1, fig. 3                                             |
| <i>Reopahx gaussicus</i> (Rhumbler, 1913)                         | Jones (1994), pl. 31, figs. 1-2                                                                                                   |
| <i>Reopahx longicollis</i> (Wiesner, 1931)                        | Timm (1992), pl. 1, fig. 10                                                                                                       |
| <i>Reopahx membranaceus</i> (Brady, 1879)                         | Jones (1994), pl. 32, figs. 1-4                                                                                                   |
| <i>Reopahx micaceus</i> Earland, 1934                             | Timm (1992), pl. 2, fig. 6                                                                                                        |

## Appendix A: Species of benthic foraminifera of the Murray ridge, with reference to plates and figures in the literature.

|                                                                |                                                                                                                                  |
|----------------------------------------------------------------|----------------------------------------------------------------------------------------------------------------------------------|
| <i>Reophax nodulosus</i> Brady, 1879                           | Jones (1994), pl. 31, figs. 6-9                                                                                                  |
| <i>Reophax scorpiurus</i> de Montfort, 1808 (Plate 1, fig. 23) | Schröder (1986), pl. 14, figs. 1-5, pl. 23                                                                                       |
| <i>Leptohalysis scotti</i> (Chaster, 1892)                     | Mojtahid (2008) <i>Reophax scotti</i> , pl. 2-7, fig. 38                                                                         |
| <i>Reophax subfusiformis</i> Earland, 1933                     | Timm (1992), pl. 2, fig. 1                                                                                                       |
| <i>Reophax</i> cf. <i>spiculifer</i>                           | Test slightly curved. Elongated chambers relatively finely grained. Timm (1992), <i>Reophax spiculifer</i> , pl. 2, fig. 7       |
| <i>Reophax</i> spp.                                            |                                                                                                                                  |
| <i>Saccamina sphaerica</i> Brady, 1871                         | Jones (1994), pl. 18, figs. 11-15                                                                                                |
| <i>Siphotextularia bermudezi</i> Mikhalevich, 1978             | Schiebel (1992), pl. 6, fig. 16                                                                                                  |
| <i>Spiroplectammia</i> spp.                                    |                                                                                                                                  |
| <i>Technitella legumen</i> Norman, 1878                        | Jones (1994), pl. 25, figs. 8-10                                                                                                 |
| <i>Textularia</i> sp. 1                                        | Biserial test composed of coarse grains. Small simple aperture.                                                                  |
| <i>Textularia</i> sp. 2                                        | Biserial test with rounded chambers. Large lateral aperture. The test is finely grained mainly composed of calcareous fragments. |
| <i>Textularia</i> sp. 3                                        | Small biserial species, only composed of coccoliths.                                                                             |
| <i>Textularia pseudorugosa</i> (Brady, 1884)                   | Jones (1994), pl. 42, figs. 23-24                                                                                                |
| <i>Trochammina</i> sp. 1                                       | Small specimens with a trochospiral test. Test is exclusively composed of coccoliths.                                            |
| <i>Trochammina</i> spp.                                        |                                                                                                                                  |
| <i>Veloroninoides wiesneri</i> (Parr, 1950)                    | Jones (1994), pl. 40, figs. 14-15                                                                                                |
| <i>Verneulinulla propinqua</i> (Brady, 1848)                   | Jones (1994), pl. 47, figs. 8-12                                                                                                 |

| Perforate species                                         | References                                                                                                                                                                                                     |
|-----------------------------------------------------------|----------------------------------------------------------------------------------------------------------------------------------------------------------------------------------------------------------------|
| <i>Alliatina primitiva</i> (Cushman and MacCulloch, 1940) | Schiebel (1992), pl. 5, fig. 11                                                                                                                                                                                |
| <i>Bolivina cincta</i> Heron-Allen and Earmann, 1922      | Timm (1992), pl. 5, fig. 3                                                                                                                                                                                     |
| <i>Bolivina dilatata</i> Reuss, 1850                      | Schiebel (1992), pl. 1, fig. 4a                                                                                                                                                                                |
| <i>Bolivina</i> aff. <i>B. dilatata</i>                   | Schumacher et al. (2007), <i>Bolivina</i> aff. <i>B. dilatata</i> , pl.1, figs. 8-12 / Maas (2000), <i>Bolivina dilatata</i> , pl. 2, fig. 5 / Jannink et al. (1998), <i>Bolivina dilatata</i> , pl. 1, fig. 1 |
| <i>Bolivina seminuda</i> Cushman, 1911                    | Den Dulk (2001), pl. 1, fig. 4                                                                                                                                                                                 |

## Appendix A: Species of benthic foraminifera of the Murray ridge, with reference to plates and figures in the literature.

|                                                       |                                                                                                                                                   |
|-------------------------------------------------------|---------------------------------------------------------------------------------------------------------------------------------------------------|
| <i>Bolivina pygmae</i> (Brady, 1884)                  | Den Dulk et al. (2000), pl. 2, fig. 7                                                                                                             |
| <i>Bolivina</i> sp. 1                                 | Small biserial test with large pores. Chambers are strongly inflated and spinose at the base. The aperture is lateral and wide.                   |
| <i>Bolivina</i> sp. 2                                 | Very small specimens with flattened, biserial and elongated test.                                                                                 |
| <i>Bolivina</i> sp. 3                                 | Very small specimens, biserial, with short length/width ratio.                                                                                    |
| <i>Bulimina aculeata</i> d'Orbigny, 1826              | Jones (1994), pl. 51, figs. 7-9                                                                                                                   |
| <i>Bulimina alazensis</i> Cushman, 1927               | Schmiedl (1995), pl. 2, fig. 7                                                                                                                    |
| <i>Bulimina costata</i> d'Orbigny, 1852               | <i>Bulimina striata</i> (d'Orbigny, in Guérin-Méneville, 1843)/<br>Jones (1994), pl. 51, figs. 11, 13<br>Schumacher et al. (2007), pl. 1, fig. 15 |
| <i>Bulimina exilis</i> Brady, 1884                    | Jannink et al. (1998), pl. 1, fig. 3<br>This species is now named <i>Eubulimina exilis</i> by several authors.                                    |
| <i>Bulimina</i> cf. <i>mexicana</i>                   | Chambers are more elongated than <i>Bulimina mexicana</i> with many pores.                                                                        |
| <i>Bulimina marginata</i> d'Orbigny, 1826             | Jones (1994), pl. 51, figs. 5-6                                                                                                                   |
| <i>Cassidulina crassa</i> d'Orbigny, 1839             | Jones (1994), pl. 54, fig. 4                                                                                                                      |
| <i>Cassidulina laevigata</i> d'Orbigny, 1826          | Den Dulk (2000), pl. 3, fig. 7                                                                                                                    |
| <i>Cassidulina obtusa</i> Williamson, 1858            | Jones (1994), pl. 54, fig. 5                                                                                                                      |
| <i>Cassidulina</i> sp. 1                              | Small specimens with more inflated than <i>Cassidulina crassa</i> .                                                                               |
| <i>Cassidulinoides bradyi</i> Norman, 1881            | Jones (1994), pl. 54, figs. 6-9                                                                                                                   |
| <i>Chilostomilla oolina</i> Schwager, 1878            | Jones (1994), pl. 55, figs. 12-14, figs. 17-18                                                                                                    |
| <i>Cibicidoides globulosus</i> Chapman and Parr, 1937 | Jones (1994), pl. 94, figs. 4-5                                                                                                                   |
| <i>Cibicides kullenbergi</i> (Parker, 1953)           | Den Dulk (2000), pl. 6, fig. 2                                                                                                                    |
| <i>Cibicidoides robertsonianus</i> (Brady, 1881)      | Jones (1994), pl. 95, fig. 4                                                                                                                      |
| <i>Cibicidoides ungerianus</i> (d'Orbigny, 1846)      | Fontanier (2003), pl. 6, fig. J                                                                                                                   |
| <i>Cibicidoides wuellerstorfi</i> (Schwager, 1866)    | Jones (1994), pl. 98, figs. 8-9                                                                                                                   |
| <i>Cibicidoides</i> sp. 1                             | Very small specimens with small pores on the dorsal side.                                                                                         |
| <i>Cornucoculina</i> spp.                             |                                                                                                                                                   |

## Appendix A: Species of benthic foraminifera of the Murray ridge, with reference to plates and figures in the literature.

*Dentalina* spp.

*Discorbina* spp.

*Ehrenbergina trigona* Goës, 1896

Jones (1994), pl. 55, figs. 2-3, 5

*Epistominella exigua* (Brady, 1884)

Schmiedl et al. (1997), pl. 2, figs. 14-15

*Fissurina incomposita* (Patterson and Pettis, 1986)

Jones (1994), pl. 59, fig. 6

*Fissurina laevigata* Reuss, 1850

Jones (1994), pl. 114, fig. 8

*Fissurina* spp.

*Fursenkoina complanata* (Egger, 1893)

Jones (1994), pl. 52, figs. 1-3

*Fursenkoina mexicana* (Cushman, 1922)

Schmiedl (1995), pl. 2, figs. 14-15

*Fursenkoina* sp.

Elongated test with more whirls than *Globobulimina* sp.

*Gavelinopsis translucens* (Phleger and Parker, 1951)

Timm (1992), pl. 7, fig. 12

*Gavelinopsis lobatulus* (Parr, 1950)

Den Dulk (2000), pl. 4, fig. 6

*Glandulonodosaria calomorpha* (Reuss, 1866)

Jones (1994), pl. 62, figs. 23-26

*Globocassidulina subglobosa* (Brady, 1881)

Jones (1994), pl. 54, fig. 17

*Globobulimina* spp.

*Gyroidina altiformis* R.E. and K.C. Stewart, 1930

Fontanier (2003), pl. 7, figs. I, J, K

*Gyroidina soldanii* d'Orbigny, 1826

Den Dulk (2000), pl. 8, fig. 2

*Gyroidina umbonata* (Silvestri, 1898)

Fontanier (2003), pl. 7, figs. N, O

*Gyroidina* sp. 1

Deformed *Gyroidina* sp.

*Gyroidina* sp. 2

Small trochospiral specimens with small pores on the umbilical side. Sutures between chambers are straight. The aperture is interiomarginal.

*Gyroidina* sp. 3

Small trochospiral specimens with a low length/width ratio. Bordered aperture.

*Gyroidina* sp. 4

Very small with elongated trochospiral test.

*Hoeglundina elegans* (d'Orbigny 1826)

Jones (1994), pl. 105, figs. 3-6

*Hyalinea balthica* (Schroeter, 1873)

Jones (1994), pl. 112, figs. 1-2

*Lagena laevis* (Montagu, 1803)

Jones (1994), pl. 56, fig. 7

*Lagena sulcata* (Walker and Jacob, 1798)

Jones (1994), pl. 57, figs. 23,25-27, 33-34

## Appendix A: Species of benthic foraminifera of the Murray ridge, with reference to plates and figures in the literature.

*Lagena* spp.

*Laticarinina pauperata* (Parker and Jones, 1865) Jones (1994), pl. 104, figs. 3-11

*Lenticullina calcar* (Linné, 1767) Jones (1994), pl. 70, figs. 9-12

*Lenticullina convergens* (Bornemann 1855) Jones (1994), pl. 69, figs. 6-7

*Marginulina obesa* Cushman, 1923 Jones (1994), pl. 65, figs. 5-6

*Melonis barleeanus* Williamson, 1958 Jones (1994), pl. 109, figs. 8-9

*Nonion* spp. Small specimens

*Nuttalides pusillus* (Parr, 1950) Van Leeuwen (1989), pl. 14, figs. 7-9

*Nuttalides rugosus* (Phleger and Parker, 1951) Van Leeuwen (1989), pl. 16, figs. 8-10

*Nuttalides umboniferus* (Cushman, 1933) Van Leeuwen (1989), pl. 15, figs. 8-10, 11-13

*Nuttalides* sp. 1 Small specimens with low trochospiral test and elongated aperture. Presence of pores on the ventral and dorsal side.

*Oolina globosa* (Montagu, 1803) Jones (1994), pl. 56, figs. 1-2, ?3

*Oridorsalis umbonatus* Reuss, 1851 Jones (1994), pl. 95, fig. 11

*Osangularia culter* (Parker and Jones, 1865) Schmiedl et al. (1997), pl. 2, figs. 4-6

*Polymorphina* spp.

*Procerolagena gracilis* (Williamson, 1848) Jones (1994), pl. 58, figs. 9, ?11-15

*Praeglobobulimina* sp. Schumacher et al. (2007), pl. 1, fig. 17 / Den Dulk (2000), *Globobulimina affinis* (d'Orbigny), pl. 1, fig. 11 / Maas (2000), *Protoglobobulimina pupoides* (d'Orbigny, 1846), pl. 3, fig. 12

*Pullenia bulloides* (d'Orbigny, 1846) Jones (1994), pl. 84, figs. 12-13

*Pullenia quinqueloba* (Reuss, 1851) Den Dulk (2000), pl. 4, figs. 2-3

*Pullenia* sp. 1 Planispiral test multichambered with a large marginal aperture.

*Pullenia* spp. very small specimens

*Robertina tasmanica* Parr, 1950 Jones (1994), pl. 50, fig. 17

*Rotaliatinopsis semiinvoluta* (Germeraad, 1946) Loeblich and Tappan (1988), pl. 714, figs. 7 and 11

## Appendix A: Species of benthic foraminifera of the Murray ridge, with reference to plates and figures in the literature.

|                                                          |                                                                                                                                                                                                                                                                                                                                                              |
|----------------------------------------------------------|--------------------------------------------------------------------------------------------------------------------------------------------------------------------------------------------------------------------------------------------------------------------------------------------------------------------------------------------------------------|
| <i>Sphaeroidina bulloides</i> (Deshayes, 1832)           | Jones (1994), pl. 84, figs. 1-5                                                                                                                                                                                                                                                                                                                              |
| <i>Spirillina obconica</i> Brady, 1879                   | Jones (1994), pl. 85, figs. 6-7                                                                                                                                                                                                                                                                                                                              |
| <i>Spirillina</i> sp. 1                                  | Coiled test with more flattened chamber than <i>Spirillina obconica</i> .                                                                                                                                                                                                                                                                                    |
| <i>Truncatulina</i> sp. 1                                | Low trochospiral test with a keel.                                                                                                                                                                                                                                                                                                                           |
| <i>Siphouvigerina ampullacea</i> (Brady, 1884)           | Jones (1994), pl. 75, figs. 10-11                                                                                                                                                                                                                                                                                                                            |
| <i>Uvigerina peregrina</i> Cushman, 1923                 | Under <i>U. peregrina</i> , we grouped uvigerinids having large and high costae and spinose tests (Plate 1; Figs 1-2). Morphotypes change very gradually from typical <i>U. peregrina</i> s. s. (Cushman, 1923) (Plate 1, Fig. 2; see Schmiedl et al., (1997), pl. 3, fig. 3) to <i>U. auberiana</i> (Jones, 1994, pl. 75, fig. 9) with fully spinose tests. |
| <i>Uvigerina peregrina</i> type <i>parva</i> Lutze, 1986 | Specimens are smaller, smoother and have weakly developed lower costae than <i>U. peregrina</i> . Schönfeld (2006), pl. 1, figs. 12-13                                                                                                                                                                                                                       |
| <i>Uvigerina</i> ex. gr. <i>Semiornata</i>               | Schumacher et al. (2007), pl. 1, figs. 1-6                                                                                                                                                                                                                                                                                                                   |
| <i>Valvulineria glabra</i> Cushman, 1927                 | Todd (1965), fig. 3                                                                                                                                                                                                                                                                                                                                          |
| <i>Valvulineria</i> sp. 1                                | Small specimens.                                                                                                                                                                                                                                                                                                                                             |
| indet 2                                                  | Organic wall foraminifera                                                                                                                                                                                                                                                                                                                                    |

| Miliolid species                                            | References                                                          |
|-------------------------------------------------------------|---------------------------------------------------------------------|
| <i>Cornuspira carrinata</i> (Costa, 1856)                   | Jones (1994), pl. 11, fig. 4                                        |
| <i>Cornuspira selseyensis</i> Heron-Allen and Earland, 1909 | Hayward and Ryland (1990), fig. 3                                   |
| <i>Cornuspiroides primitivus</i> (Rhumbler, 1904)           | Jones (1994), pl. 11, figs. 8-9                                     |
| <i>Miliolid</i> sp. 1                                       | Elongated and flattened uniserial test. Large size simple aperture. |
| <i>Milliolinella</i> sp. 1                                  | Very small specimens, biserial with rounded aperture.               |
| <i>Pyrgo depresa</i> (d'Orbigny, 1826)                      | Jones (1994), pl. 2, figs. 12, 16-17                                |
| <i>Pyrgo lucernula</i> (Schwager, 1866)                     | Jones (1994), pl. 2, figs. 5-6                                      |
| <i>Pyrgo murrhina</i> (Schwager, 1866)                      | Jones (1994), pl. 2, figs. 10-11, 15                                |
| <i>Pyrgoella sphaera</i> (d'Orbigny, 1839)                  | Jones (1994), pl. 2, fig. 4                                         |

**Appendix A: Species of benthic foraminifera of the Murray ridge, with reference to plates and figures in the literature.**

*Pyrgo* spp.

*Quinqueloculina tropicalis* Cushman, 1924

Jones (1994), pl. 5, fig. 3

*Quinqueloculina* spp.

Very small specimens that have been separated into 5 species for the diversity.

*Spiroloculina* spp.

Very small specimens that have been separated into 3 species for the diversity.

*Spirosigmoilina tenuis* (Czjzek, 1848)

Jones (1994), pl. 10, figs. 7, 8, 11

*Triloculina* spp.
