# Supplementary material for: Live (Rose Bengal stained) foraminiferal faunas from the northern Arabian Sea: faunal succession within and below the OMZ
Source: Copernicus journal article supplement (doi:10.5194/bg-11-1155-2014), 2014-02-26
Supplement: Supplementary file 1 [file Appenices.docx]

Appendix A

Species of benthic foraminifera of the Murray ridge, with

reference to plates and figures in the literature

Appendix B

Raw data counts

Appendix C

PCA plot based on the relative abundances of the dominant

species ($>$\,2\,{\%} in at least one sample) in the first cm (0-1cm)

in the \textgreater 63\textmu m size fraction and a plot of the percentages

of the three defined groups at the various sites
