# Supplementary material for: Live (Rose Bengal stained) foraminiferal faunas from the northern Arabian Sea: faunal succession within and below the OMZ
Source: Copernicus journal article supplement (doi:10.5194/bg-11-1155-2014), 2014-02-26
Supplement: Supplementary file 2 [file Appendix C.pdf › appendix/Appendix C.pdf]

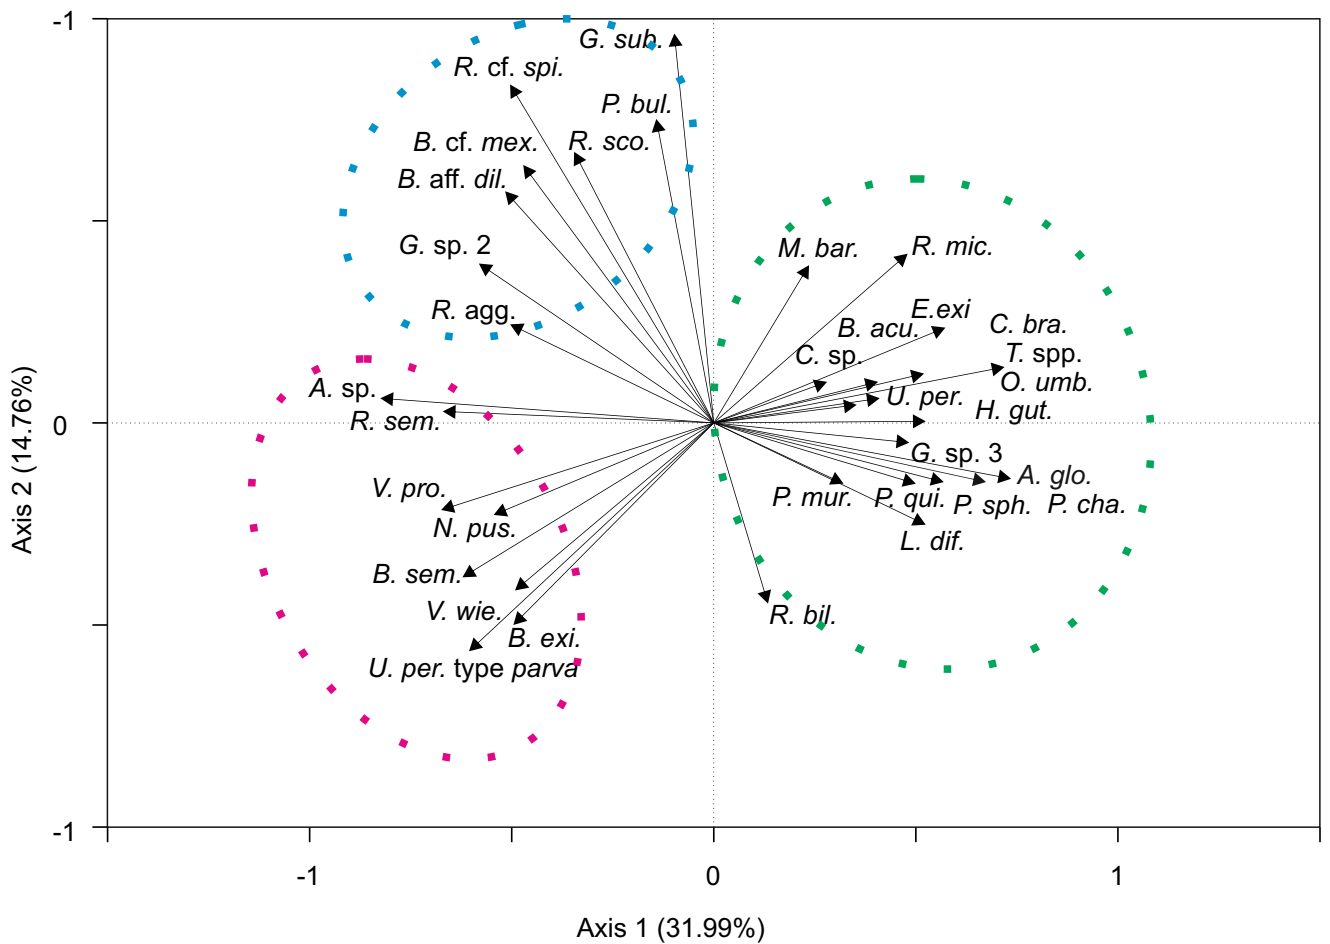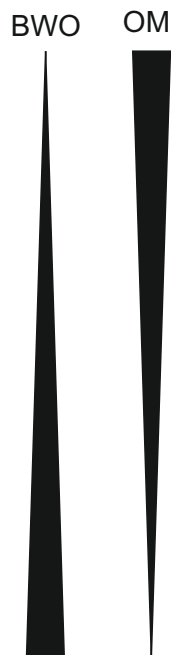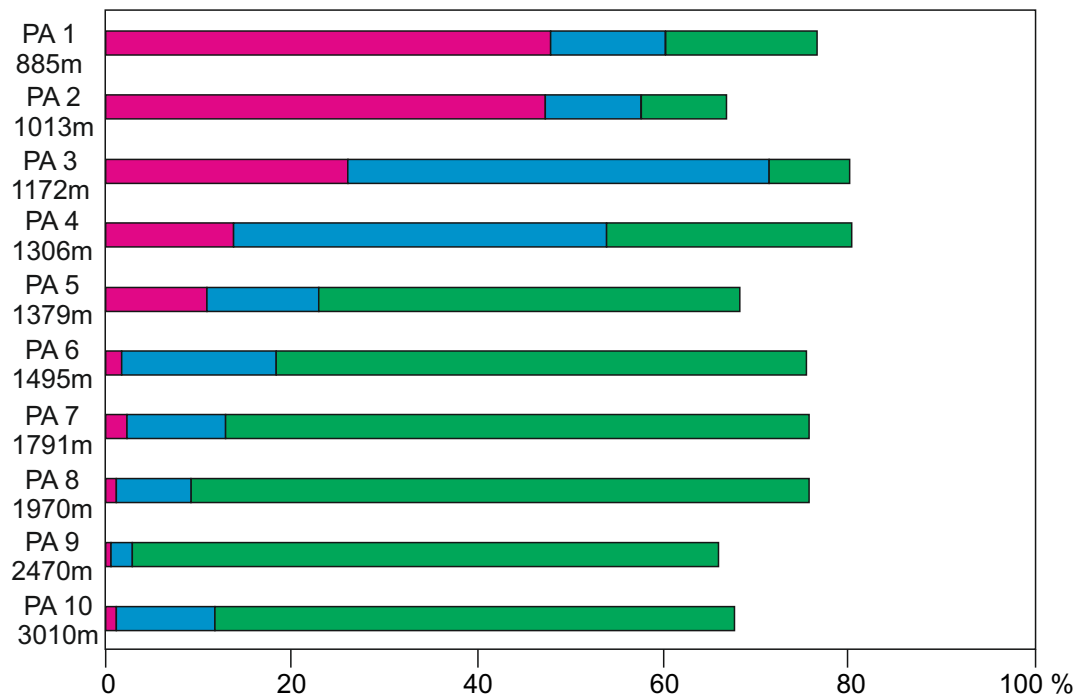

**Abbreviations:**

**Group 1:** *Ammodiscus* sp. (**A. sp.**); *Rotaliatinopsis semiinvoluta* (**R. sem.**); *Verneuilinella propinqua* (**V. pro.**); *Nuttalides pusillus* (**N. pus.**); *Bulimina exilis* (**B. exi.**); *Uvigerina peregrina* type parva (**U. per. type parva**); *Veleroninoides wiesneri* (**V. wie.**); *Bolivina seminuda* (**B. sem.**)

**Group 2:** *Pullenia bulloides* (**P. bul.**); *Globocassidulina subglobosa* (**G. sub.**); *Reophax cf. spiculifer* (**R. cf. spi.**); *Reophax scorpiurus* (**R. sco.**); *Bulimina cf. mexicana* (**B. cf. mex.**); *Bolivina aff. dilatata* (**B. aff. dilatata**); *Gyroidina* sp. 2 (**G. sp. 2**); *Reophax agglutinans* (**R. agg.**)

**Group 3:** *Melonis barleeanus* (**M. bar.**); *Reophax micaceus* (**R. mic.**); *Epistominella exigua* (**E. exi.**); *Bulimina aculeata* (**B. acu.**); *Cribratomoides* sp. (**C. sp.**); *Cribratomoides brady* (**C. bra.**); *Trochammina* spp. (**T. spp.**); *Uvigerina peregrina* (**U. per.**); *Hormosina guttifer* (**H. gut.**); *Gyroidina* sp. 3 (**G. sp. 3**); *Adercotryma glomeratum* (**A. glo.**); *Pyrgo murrhina* (**P. mur.**); *Pyrgoella sphaera* (**P. sph.**); *Pullenia quinqueloba* (**P. qui.**); *Paratrochammina challenger* (**P. cha.**); *Lagenammina difflugiformis* (**L. dif.**); *Reophax bilocularis* (**R. bil.**)
